# Supplementary material for: Does recruitment source moderate treatment effectiveness? A subgroup analysis from the EVIDENT study, a randomised controlled trial of an internet intervention for depressive symptoms
Source: PubMed Central journal article supplement — BMJ Open. 2017 Jul 13;7(7):e015391. doi: 10.1136/bmjopen-2016-015391 (PMC5734368; doi:10.1136/bmjopen-2016-015391), 2017-07-13
Supplement: bmjopen-2016-015391supp001.pdf [file bmjopen-2016-015391supp001.pdf]

**Supplemental Table 1:** Treatment utilization during the study period. Patients could use more than one treatment modality.

|                                                          | Intervention           |      | Care as usual          |      | <i>chi</i> <sup>2</sup> | <i>p</i> |
|----------------------------------------------------------|------------------------|------|------------------------|------|-------------------------|----------|
|                                                          | <i>n</i> = 509 (50.1%) |      | <i>n</i> = 504 (49.9%) |      |                         |          |
| Treatment between baseline and three months assessment   |                        |      |                        |      |                         |          |
| Psychotherapy                                            | 127                    | 32.3 | 140                    | 35.1 | 0.767                   | .381     |
| Outpatient psychiatric treatment                         | 106                    | 27.0 | 108                    | 27.1 | 0.005                   | .941     |
| Inpatient psychiatric treatment                          | 5                      | 1.3  | 9                      | 2.3  | 1.123                   | .289     |
| Antidepressant medication                                | 193                    | 48.9 | 204                    | 51.3 | 0.455                   | .500     |
| Treatment between three months and six months assessment |                        |      |                        |      |                         |          |
| Psychotherapy                                            | 118                    | 31.3 | 119                    | 31.7 | 0.016                   | .898     |
| Outpatient psychiatric treatment                         | 94                     | 24.9 | 96                     | 25.6 | 0.044                   | .833     |
| Inpatient psychiatric treatment                          | 6                      | 1.6  | 9                      | 2.4  | 0.629                   | .428     |
| Antidepressant medication                                | 192                    | 50.8 | 192                    | 51.2 | 0.012                   | .911     |
